# Supplementary material for: Explorations of new phases in the GaIII/InIII–MoVI–SeIV/TeIV–O systems
Source: Royal Society of Chemistry journal article supplement (doi:10.1039/b903616d), 2009-01-01
Supplement: b903616d.pdf [file b903616d.pdf]

## Explorations of New Phases in the Ga<sup>III</sup>/In<sup>III</sup>-Mo<sup>VI</sup>-Se<sup>IV</sup>/Te<sup>IV</sup>-O Systems

Fang Kong,<sup>a,b</sup> Chun-Li Hu,<sup>a</sup> Ting Hu,<sup>a,b</sup> Yong Zhou<sup>a,b</sup> and Jiang-Gao Mao<sup>\*a</sup>

<sup>a</sup>State Key Laboratory of Structural Chemistry, Fujian Institute of Research on the Structure of Matter, Chinese Academy of Sciences, Fuzhou 350002, P. R. China

FAX: (+86)591-83714946; E-mail: mjpg@ffirms.ac.cn

<sup>b</sup>Graduate School of the Chinese Academy of Sciences, Beijing, 100039, P. R. China

Table S1. The calculated bond orders of the compounds.

| For Ga <sub>2</sub> MoSe <sub>2</sub> O <sub>10</sub>                                  |             |            |      |             |            |
|----------------------------------------------------------------------------------------|-------------|------------|------|-------------|------------|
| Bond                                                                                   | Bond length | Bond order | Bond | Bond length | Bond order |
| Mo-O                                                                                   | 1.69352     | 0.83       | Mo-O | 1.88337     | 0.49       |
| Mo-O                                                                                   | 1.96313     | 0.39       | Mo-O | 2.51539     | 0.10       |
| Se-O                                                                                   | 1.68245     | 0.41       | Se-O | 1.69313     | 0.34       |
| Se-O                                                                                   | 1.75660     | 0.40       | Se-O | 1.76398     | 0.38       |
| Ga-O                                                                                   | 1.92960     | 0.38       | Ga-O | 1.93502     | 0.35       |
| Ga-O                                                                                   | 1.97502     | 0.31       | Ga-O | 1.99222     | 0.29       |
| Ga-O                                                                                   | 1.99909     | 0.29       | Ga-O | 2.00771     | 0.27       |
| For Ga <sub>2</sub> MoTe <sub>2</sub> O <sub>10</sub>                                  |             |            |      |             |            |
| Bond                                                                                   | Bond length | Bond order | Bond | Bond length | Bond order |
| Mo-O                                                                                   | 1.71744     | 0.81       | Mo-O | 1.84750     | 0.53       |
| Mo-O                                                                                   | 1.98267     | 0.39       | Mo-O | 2.37248     | 0.17       |
| Te-O                                                                                   | 1.86684     | 0.36       | Te-O | 1.88495     | 0.26       |
| Te-O                                                                                   | 1.88680     | 0.46       | Te-O | 1.92252     | 0.38       |
| Ga-O                                                                                   | 1.93246     | 0.41       | Ga-O | 1.93836     | 0.37       |
| Ga-O                                                                                   | 1.93991     | 0.35       | Ga-O | 1.98316     | 0.32       |
| Ga-O                                                                                   | 2.03986     | 0.26       | Ga-O | 2.05373     | 0.23       |
| For In <sub>2</sub> Mo <sub>2</sub> Se <sub>2</sub> O <sub>13</sub> (H <sub>2</sub> O) |             |            |      |             |            |
| Bond                                                                                   | Bond length | Bond order | Bond | Bond length | Bond order |
| Mo-O                                                                                   | 1.69069     | 0.81       | Mo-O | 1.72480     | 0.65       |
| Mo-O                                                                                   | 1.86255     | 0.49       | Mo-O | 1.90791     | 0.44       |
| Mo-O                                                                                   | 2.34809     | 0.18       | Mo-O | 2.48674     | 0.06       |
| Se-O                                                                                   | 1.68310     | 0.45       | Se-O | 1.68601     | 0.35       |
| Se-O                                                                                   | 1.72557     | 0.29       | H-O  | 0.85047     | 0.64       |
| In-O                                                                                   | 2.08108     | 0.36       | In-O | 2.13407     | 0.35       |

|                                                       |             |            |      |             |            |
|-------------------------------------------------------|-------------|------------|------|-------------|------------|
| In-O                                                  | 2.13890     | 0.24       | In-O | 2.14715     | 0.27       |
| In-O                                                  | 2.18705     | 0.22       | In-O | 2.20779     | 0.18       |
| For In <sub>2</sub> MoTe <sub>2</sub> O <sub>10</sub> |             |            |      |             |            |
| Bond                                                  | Bond length | Bond order | Bond | Bond length | Bond order |
| Mo-O                                                  | 1.71623     | 0.77       | Mo-O | 1.72597     | 0.76       |
| Mo-O                                                  | 1.82644     | 0.60       | Mo-O | 1.86957     | 0.58       |
| Te-O                                                  | 1.89831     | 0.35       | Te-O | 1.91024     | 0.37       |
| Te-O                                                  | 1.94459     | 0.26       | Te-O | 1.94603     | 0.30       |
| Te-O                                                  | 1.94730     | 0.30       | Te-O | 1.97384     | 0.25       |
| In-O                                                  | 2.09602     | 0.38       | In-O | 2.11609     | 0.36       |
| In-O                                                  | 2.11984     | 0.34       | In-O | 2.14641     | 0.31       |
| In-O                                                  | 2.17663     | 0.30       | In-O | 2.18178     | 0.30       |
| In-O                                                  | 2.19924     | 0.29       | In-O | 2.20406     | 0.24       |
| In-O                                                  | 2.21005     | 0.27       | In-O | 2.28709     | 0.21       |
| In-O                                                  | 2.34267     | 0.16       | In-O | 2.36115     | 0.20       |

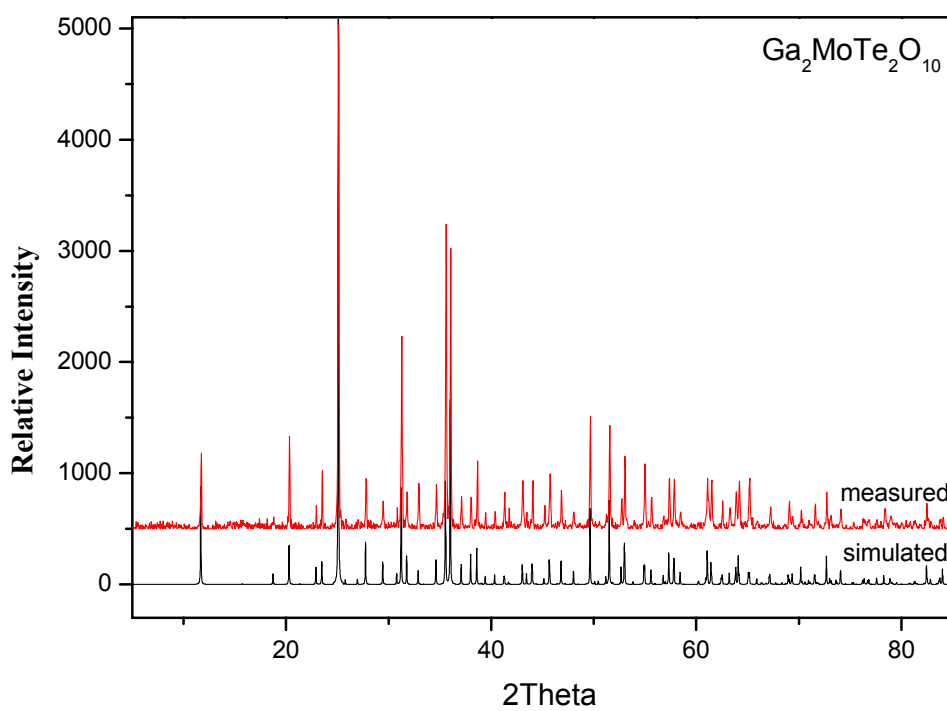

(a)

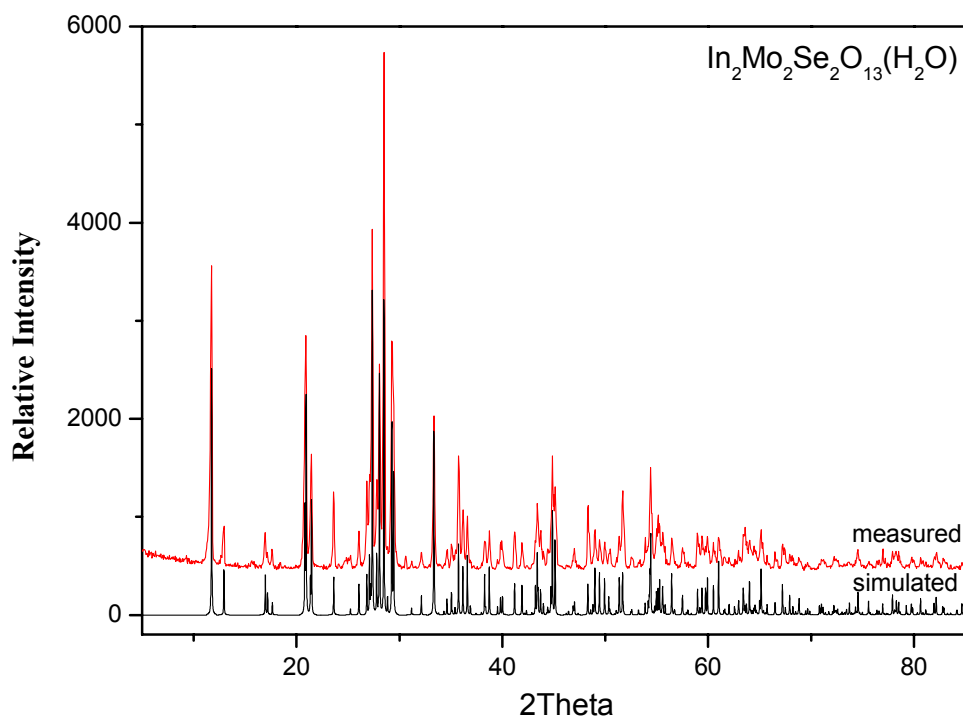

(b)

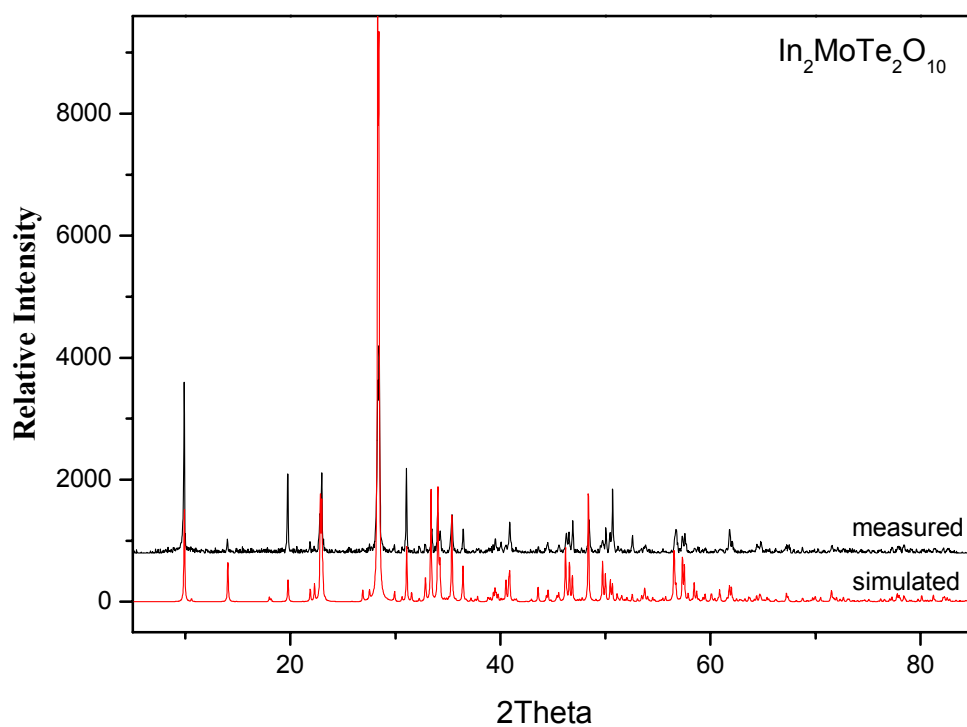

(c)

Figure S1. Simulated and measured XRD powder patterns for  $\text{Ga}_2\text{MoTe}_2\text{O}_{10}$  (a),  $\text{In}_2\text{Mo}_2\text{Se}_2\text{O}_{13}(\text{H}_2\text{O})$  (b) and  $\text{In}_2\text{MoTe}_2\text{O}_{10}$  (c).

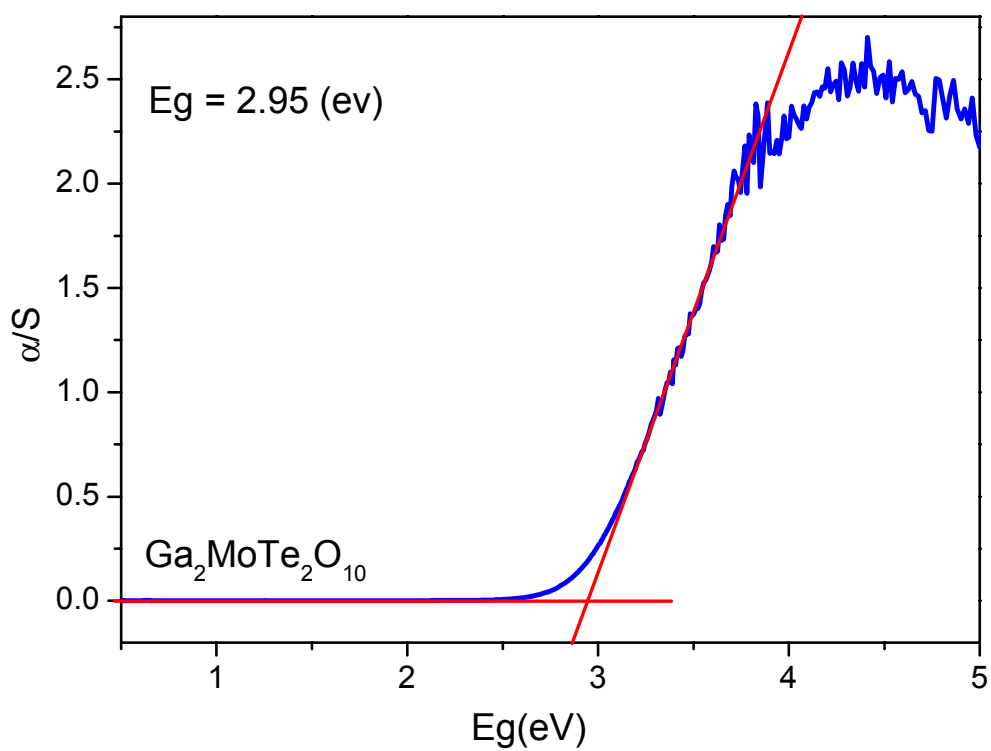

(a)

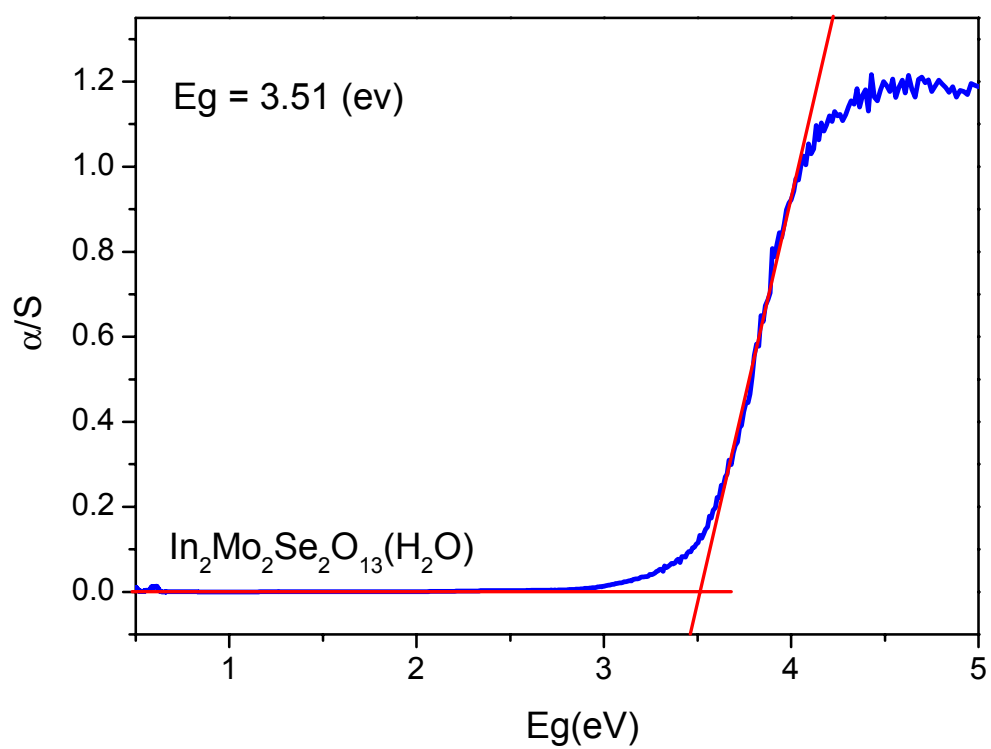

(b)

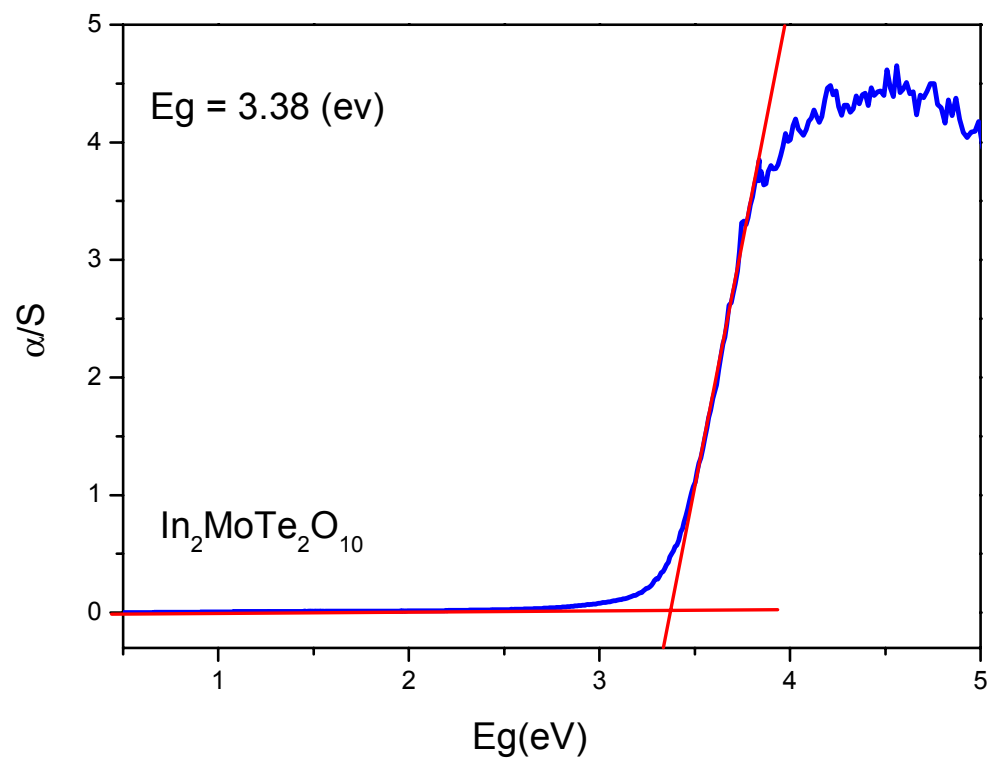

(c)

Figure S2. Optical diffuse reflectance spectra for  $\text{Ga}_2\text{MoTe}_2\text{O}_{10}$  (a),  $\text{In}_2\text{Mo}_2\text{Se}_2\text{O}_{13}(\text{H}_2\text{O})$  (b) and  $\text{In}_2\text{MoTe}_2\text{O}_{10}$  (c).

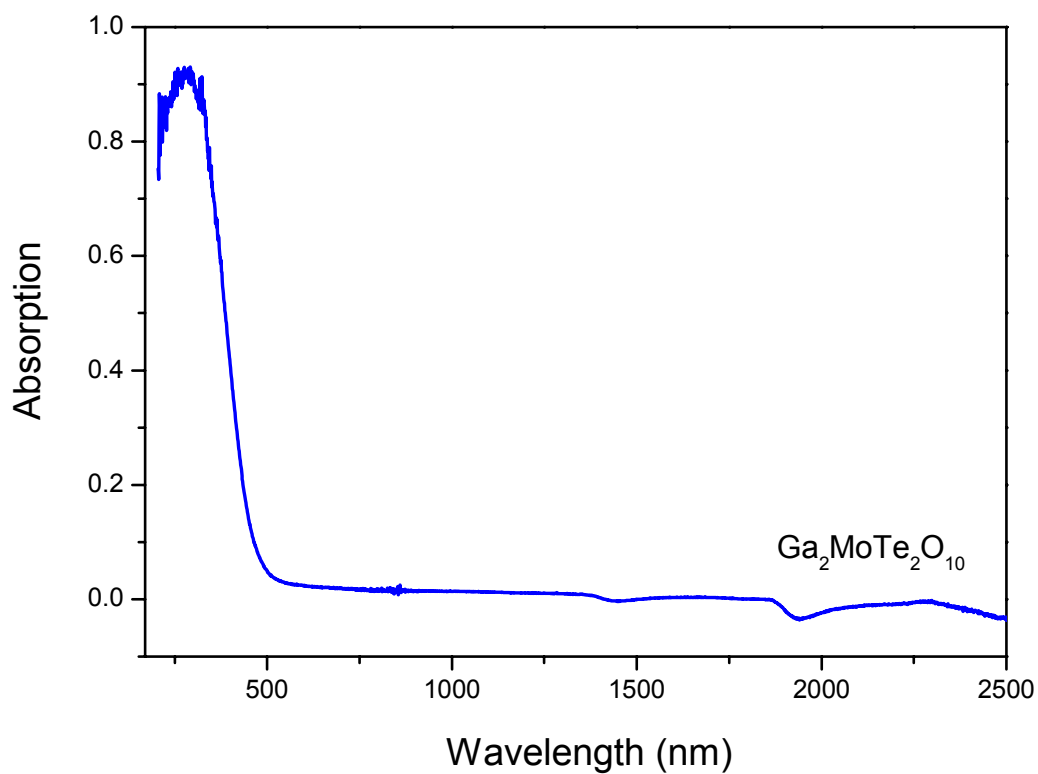

(a)

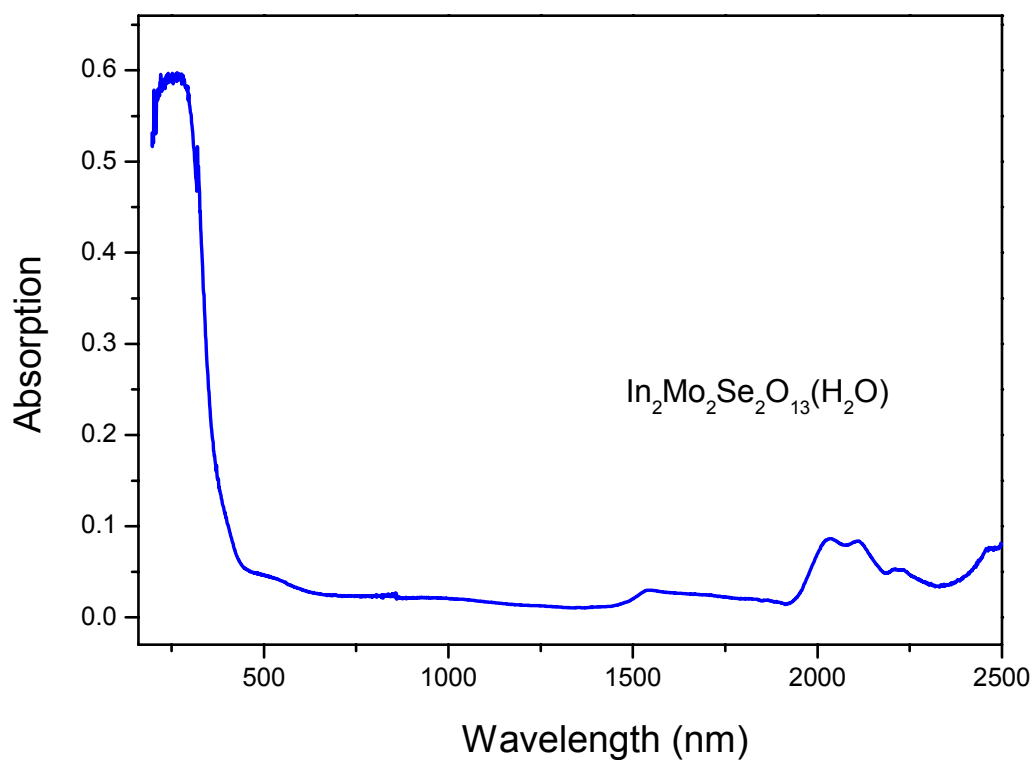

(b)

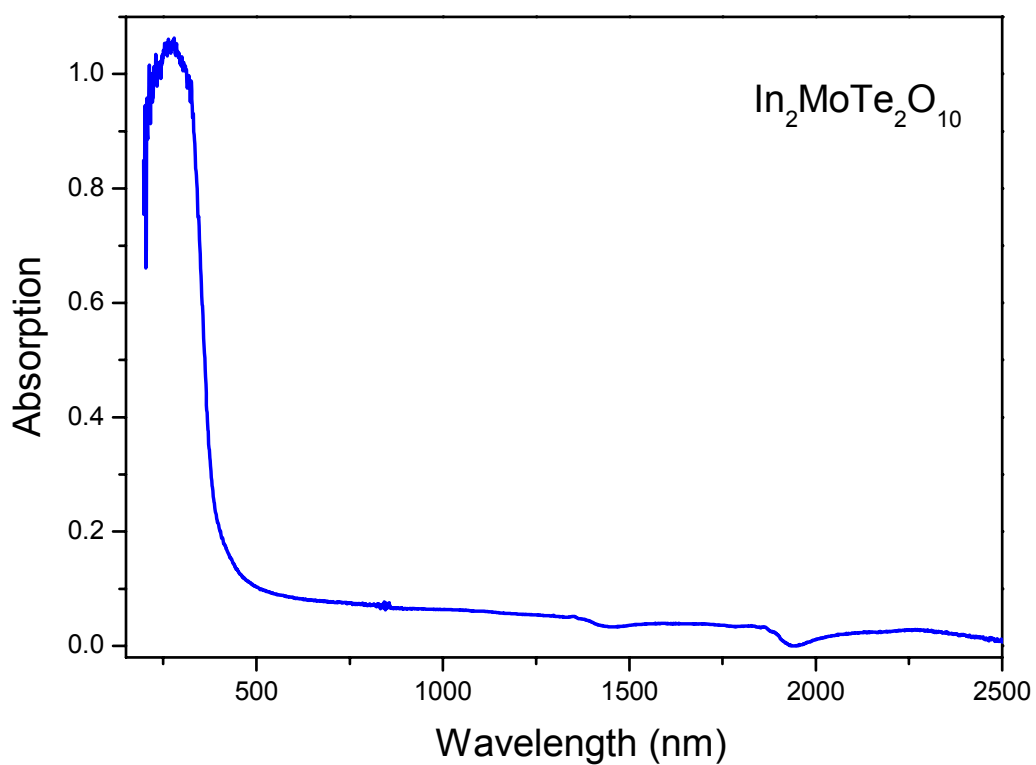

(c)

Figure S3. UV absorption spectra of  $\text{Ga}_2\text{MoTe}_2\text{O}_{10}$  (a),  $\text{In}_2\text{Mo}_2\text{Se}_2\text{O}_{13}(\text{H}_2\text{O})$  (b) and  $\text{In}_2\text{MoTe}_2\text{O}_{10}$  (c).

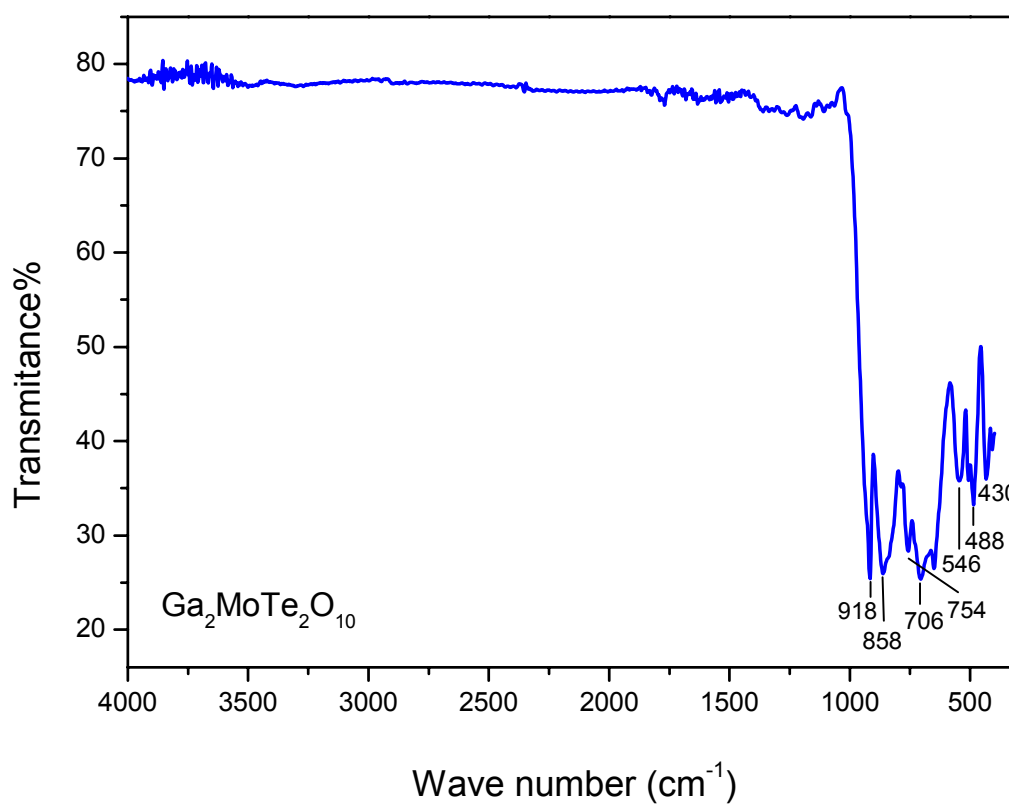

(a)

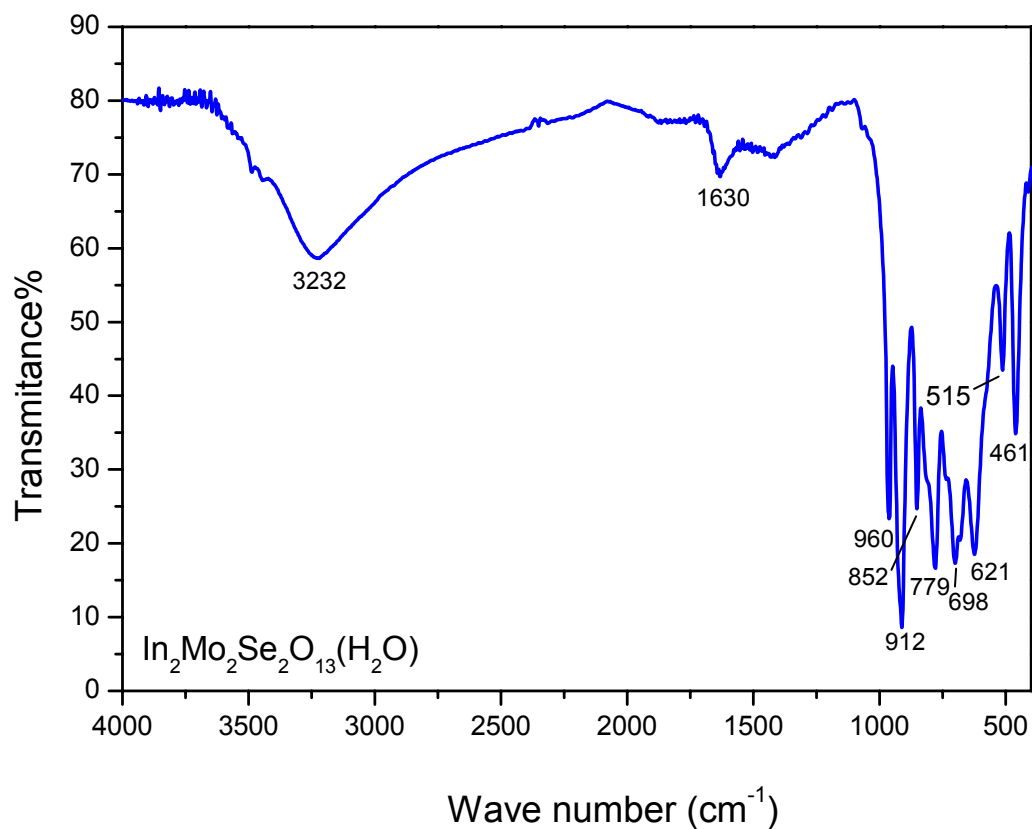

(b)

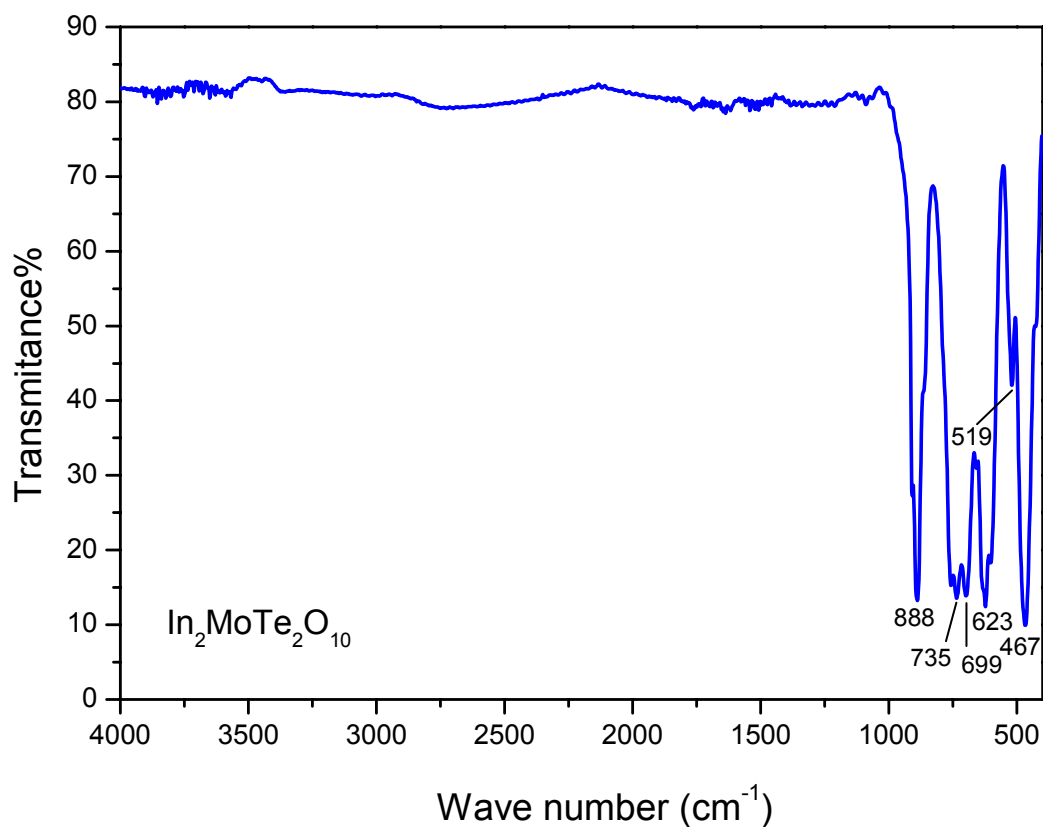



(c)

Figure S4. IR spectra of  $\text{Ga}_2\text{MoTe}_2\text{O}_{10}$  (a),  $\text{In}_2\text{Mo}_2\text{Se}_2\text{O}_{13}(\text{H}_2\text{O})$  (b) and  $\text{In}_2\text{MoTe}_2\text{O}_{10}$  (c).

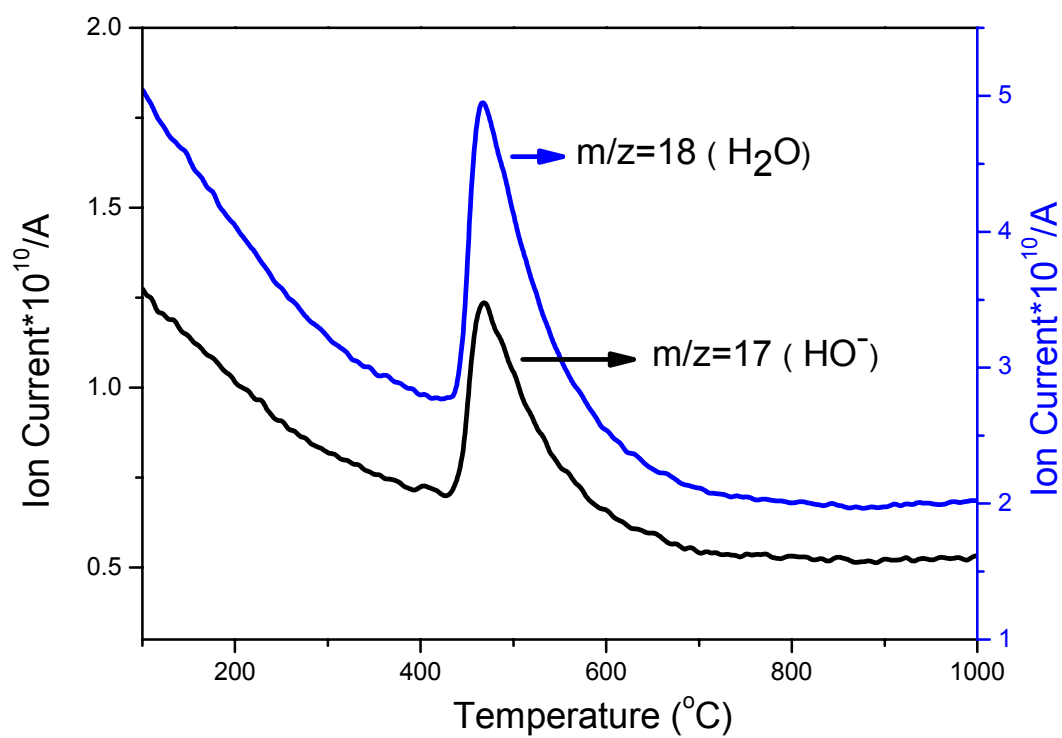

Figure S5. MS curves of  $\text{In}_2\text{Mo}_2\text{Se}_2\text{O}_{13}(\text{H}_2\text{O})$ .
